# Supplementary material for: WISP1/CCN4 inhibits adipocyte differentiation through repression of PPARγ activity
Source: PubMed Central journal article supplement (PMC5431985; doi:10.1038/s41598-017-01866-2), 2017-05-11
Supplement: 41598_2017_1866_MOESM1_ESM.pdf [file 41598_2017_1866_MOESM1_ESM.pdf]

## **Supplementary Information**

### **WISP1/CCN4 inhibits adipocyte differentiation through repression of PPAR $\gamma$ activity**

Nathalie Ferrand, Véronique Béreziat, Marthe Moldes, Maurice  
Zaoui, Annette K. Larsen and Michèle Sabbah

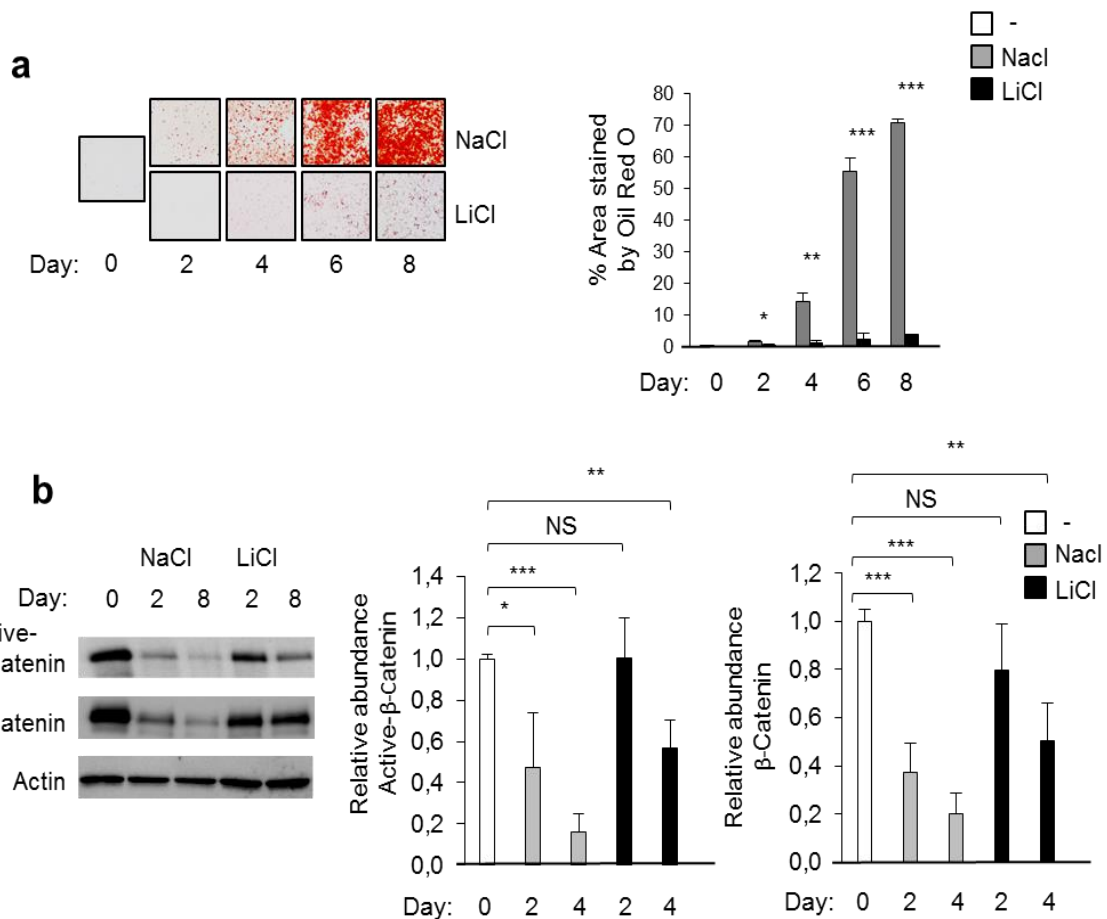

Fig. S1: Stimulation of Wnt signaling inhibits adipocyte differentiation.

3T3-F442A preadipocytes were exposed to MDI media supplemented with 25 mM Lithium Chloride (LiCl) or, as negative control, 25 mM Sodium Chloride (NaCl). (a)

The differentiation process was monitored by microscopic imaging after Oil Red O-staining. Subsequently, Oil Red O-positive areas were measured by image

analysis. (b) The expression of total or active β-catenin following LiCl or NaCl

treatment was assessed by immunoblotting. Immunoblot signals were quantified by

densitometry, and normalized with actin. The values indicate the changes for the

indicated sample compared to the vehicle. All values are representative of data from

3 independent experiments each performed in duplicate. Results are presented as

means ± SEM \*  $p < 0.05$ ; \*\*  $p < 0.01$ ; \*\*\*  $p < 0.005$ .

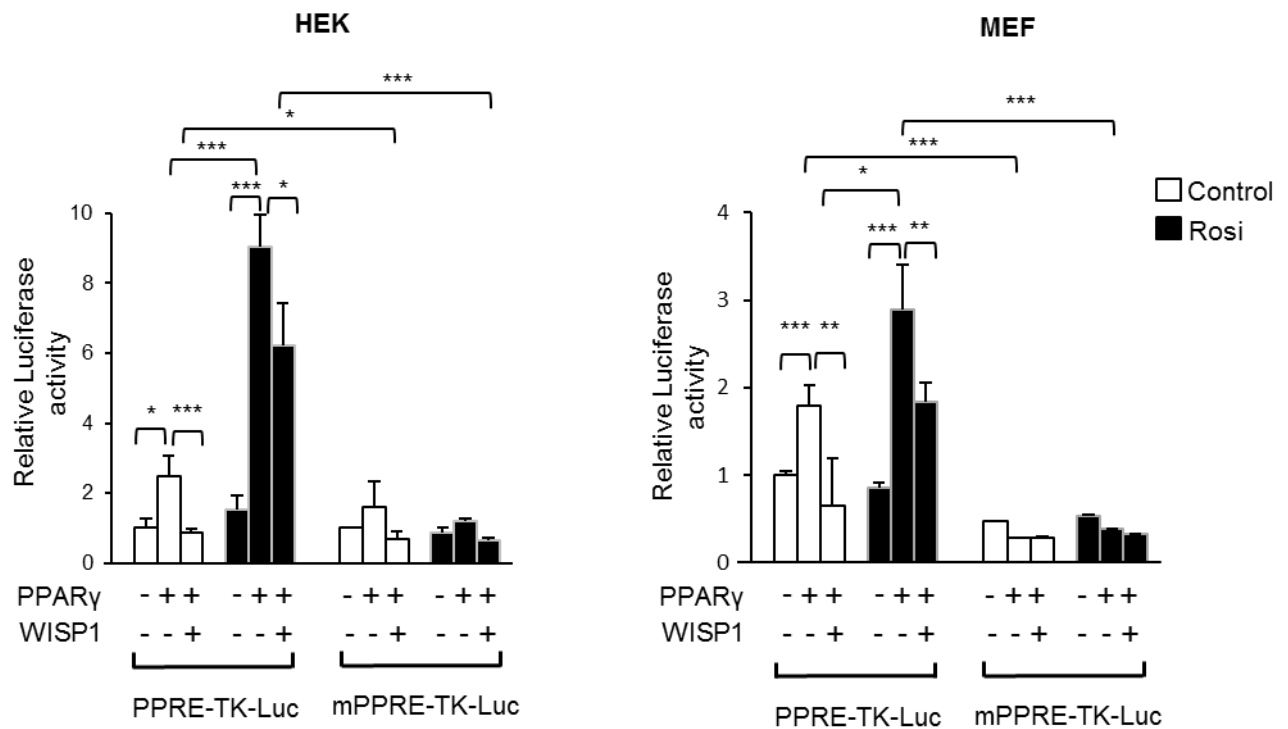

Fig. S2 : The Influence of WISP1 on PPAR $\gamma$  transcriptional activity is specific for PPAR $\gamma$ . HEK or MEF cells were transfected with 0.1  $\mu$ g of wild-type (PPRE-TK-Luc) or mutated PPRE-TK-Luc (mPPRE-TK-Luc) alone or in combinations with 0.1  $\mu$ g of PPAR $\gamma$  with or without 0.8  $\mu$ g of WISP1 expression vectors along with RSV- $\beta$ -galactosidase construct (0.02  $\mu$ g) used as an internal control. Five hours after transfection, cells were treated (black bars) or not (open bars) with 1  $\mu$ M rosiglitazone for 24 hours and assayed for luciferase and  $\beta$ -galactosidase activities. The results represent the average of at least three independent experiments each done in triplicate. Results are presented as means  $\pm$  SEM. \*  $p < 0.05$ ; \*\*  $p < 0.01$ ; \*\*\*  $p < 0.005$ .

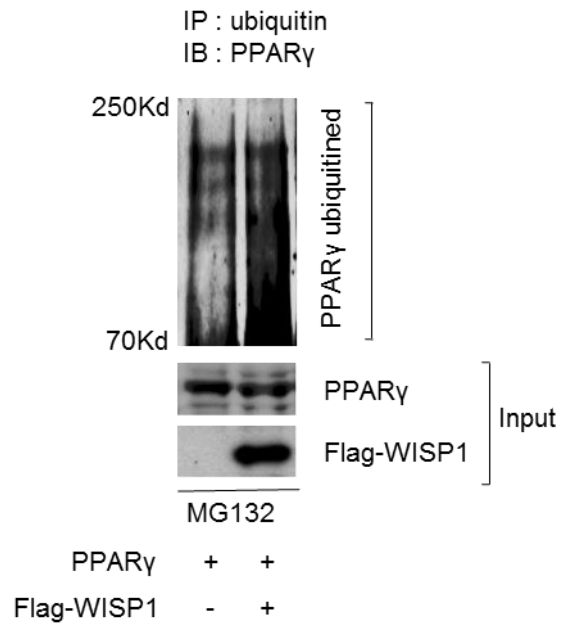

Fig. S3: WISP1 increases PPAR $\gamma$  ubiquitination. MEF cells transfected with the indicated expression vectors were treated with MG132 for 5 h before harvested and lysed, followed by immunoprecipitation using ubiquitin antibodies and Western blotting with polyclonal anti-PPAR $\gamma$  antibodies. Protein expression was determined by direct immunoblotting (Input).

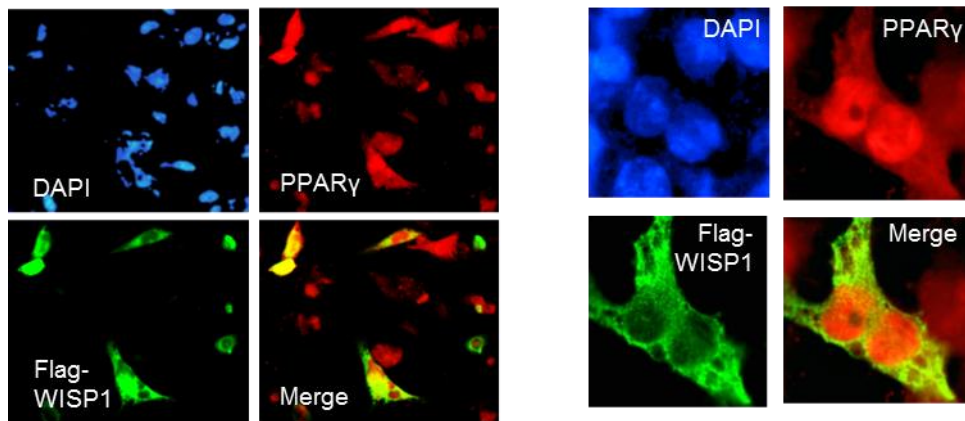

Fig. S4: Colocalization of PPAR $\gamma$  and WISP1. MEF cells were transfected with PPAR $\gamma$  and Flag-WISP1 expression vectors. The cells were immunostained with anti-PPAR $\gamma$  (red) and anti-Flag-WISP1 (green) antibodies and the nucleus was stained with DAPI. The nucleus, PPAR $\gamma$  and Flag-WISP1 were visualized by fluorescence microscopy.

| Target Genes  | Forward Sequence (5'-3') | Reverse Sequence (5'-3')    |
|---------------|--------------------------|-----------------------------|
| <i>WISP1</i>  | CTGGACAGAAAAGGGCATGT     | AGGAAGGAGGGGAAATCTCA        |
| <i>DLK1</i>   | AATAGACGTTTCGGGCTTGCA    | GGAGCATTTCGTA CTGGCCTTT     |
| <i>CEBPD</i>  | ACGACGGAGAGCGCCATC       | TCGCCGTCGCCCCAGTC           |
| <i>PPARG</i>  | TTTTCAAGGGTGCCAGTTTC     | AATCCTTGGCCCTCTGAGAT        |
| <i>ADIPOQ</i> | GTTGCAAGCTCTCCTGTTCC     | TCTCCAGGAG TGCCATCTCT       |
| <i>LPL</i>    | TTCAACCACAGCAGCAAGAC     | CTGGATAATGTTGCTGGGC         |
| <i>FABP4</i>  | TTTCCTTCAAATGGGCGTG      | CATTCCACCACCAGCTTGTC        |
| <i>CD36</i>   | GAATGGGCTGTGATCGGAAC     | ACGTCATCTGGGTTTTGCAC        |
| <i>TBP</i>    | CCCTTGTACCCTTCACCAATGAC  | TCACGGTAGATACAATATTTGAAGCTG |
| <i>GAPDH</i>  | AACTTTGGCATTGTGGAAGG     | ACACATTGGGGGTAGGAACA        |

Table S1: Real-Time RT-PCR Primer Sequences
